# Supplementary material
Source: PubMed Central journal article supplement (PMC4859584)
Supplement: JB.00982-15_zjb999094007so1.pdf [file JB.00982-15_zjb999094007so1.pdf]

## Supplemental Material :

**WrpA is an atypical flavodoxin-family protein under regulatory control of the *Brucella abortus* general stress response system**

Julien Herrou<sup>a,b</sup>, Daniel M. Czyż<sup>a,b</sup>, Jonathan W. Willett<sup>a,b</sup>, Hye-Sook Kim<sup>a,b</sup>, Gekleng Chhor<sup>c</sup>, Gyorgy Babnigg<sup>c</sup>, Youngchang Kim<sup>c</sup>, Sean Crosson<sup>a,b,d,#</sup>

<sup>a</sup>Department of Biochemistry and Molecular Biology, University of Chicago, Chicago, IL 60637, USA; <sup>b</sup>Howard Taylor Ricketts Laboratory, University of Chicago, <sup>c</sup>Argonne National Laboratory, Argonne, IL 60439, USA; and <sup>d</sup>Department of Microbiology, University of Chicago, Chicago, IL 60637, USA.

**Table S1:** Primers used for this study.

| Primer                       | Sequence                                        | Restriction sites                  | Plasmid         |
|------------------------------|-------------------------------------------------|------------------------------------|-----------------|
| <i>wrpA1</i> -UP             | TACTTCCAATCCAATGCCATGGTAAAGATGCTGGTGCTGTATTATTC | Ligation Independent Cloning (LIC) | pMCSG68 (AmpR)  |
| <i>wrpA1</i> -LO             | TTATCCACTTCCAATGTTAGCCATGCAGTTTCGCGGTAATTC      |                                    |                 |
| <i>wrpA2</i> -UP             | TATAC <b>CATATG</b> GTTAAAGATGCTGGTGCTG         | NdeI                               | pET28c (KanR)   |
| <i>wrpA2</i> -LO             | TATAC <b>CTCGAG</b> TCAGCCATGCAGTTTCGCG         | XhoI                               |                 |
| <i>wrpA</i> _Y80F-UP         | GCAACGCGC <b>TTT</b> GGCATGATG                  | -                                  | pET28c (KanR)   |
| <i>wrpA</i> _Y80F-LO         | CATCATGCC <b>AAA</b> GCGCGTTGC                  | -                                  |                 |
| <i>wrbA<sub>Ec</sub></i> -UP | TATAC <b>CATATG</b> GCTAAAGTTCTGGTGCTTT         | NdeI                               | pNPTS138 (KanR) |
| <i>wrbA<sub>Ec</sub></i> -LO | TATAC <b>CTCGAG</b> TAGCCGTTAAGTTTAACTGC        | XhoI                               |                 |
| <i>wrpA</i> -UP              | TATAG <b>GGATCC</b> GGCGCGCATAATTGTCGCC         | BamHI                              | pNPTS138 (KanR) |
| $\Delta$ <i>wrpA</i> _Mid-LO | GATTAACGGAGATGTCAGCCAAACTGGGCAGTTGCG            | -                                  |                 |
| $\Delta$ <i>wrpA</i> _Mid-UP | CGCAACTGCCAGTTTGGCTGACATCTCCGTTAATC             | -                                  |                 |
| <i>wrpA</i> -LO              | TATAG <b>GCATGC</b> TTTCAACGGCTTTGGAAATAAA      | SphI                               |                 |

**Table S2:** Strains used for this study.

| Strain # | Organism                             | Plasmid                             | Description                                                                                          | Reference                                     |
|----------|--------------------------------------|-------------------------------------|------------------------------------------------------------------------------------------------------|-----------------------------------------------|
| HTRL1    | <i>E. coli</i> Top10                 | pMCSG68- <i>wrpA</i>                | Strain carrying the expression vector for <i>B. abortus</i> WrpA.                                    | This study.                                   |
| HTRL2    | <i>E. coli</i> BL21(DE3)-Gold strain | pMCSG68- <i>wrpA</i>                | Strain used to overexpress <i>B. abortus</i> WrpA (crystal form P4 <sub>3</sub> 2 <sub>2</sub> )     | This study.                                   |
| FC2162   | <i>E. coli</i> Top10                 | pET28- <i>wrpA</i>                  | Strain carrying the expression vector for <i>B. abortus</i> WrpA.                                    | This study.                                   |
| FC2163   | <i>E. coli</i> Rosetta (DE3) pLysS   | pET28- <i>wrpA</i>                  | Strain used to overexpress <i>B. abortus</i> WrpA (crystal form P4 <sub>2</sub> 2 <sub>2</sub> )     | This study.                                   |
| FC2454   | <i>E. coli</i> Top10                 | pET28- <i>wrbA</i>                  | Strain carrying the expression vector for <i>E. coli</i> WrbA.                                       | This study.                                   |
| FC2455   | <i>E. coli</i> Rosetta (DE3) pLysS   | pET28- <i>wrbA</i>                  | Strain used to overexpress <i>E. coli</i> WrbA.                                                      | This study.                                   |
| FC2452   | <i>E. coli</i> Top10                 | pET28- <i>wrpA</i> (Y80F)           | Strain carrying the expression vector for <i>B. abortus</i> WrpA(Y80F) mutant protein.               | This study.                                   |
| FC2453   | <i>E. coli</i> Rosetta (DE3) pLysS   | pET28- <i>wrpA</i> (Y80F)           | Strain used to overexpress <i>B. abortus</i> WrpA(Y80F) mutant protein.                              | This study.                                   |
| FC2164   | <i>E. coli</i> Top10                 | pNPTS138- $\Delta$ <i>bab1_1070</i> | Strain used to delete <i>bab1_1070</i> (coding WrpA) in <i>B. abortus</i> chromosome                 | This study.                                   |
| FC2456   | <i>E. coli</i> Top10                 | pNPTS138- <i>bab1_1070</i>          | Strain used to complement <i>B. abortus</i> $\Delta$ <i>bab1_1070</i> strain with <i>bab1_1070</i> . | This study.                                   |
| 6834     | <i>B. abortus</i> 2308               | -                                   | Wild-type strain.                                                                                    | This study.                                   |
| 6544     | <i>B. abortus</i> 2308               | -                                   | <i>B. abortus</i> $\Delta$ <i>rpoE1</i> . Strain deleted for $\sigma^{E1}$ .                         | Kim H.S. <i>et al.</i> (2014) Mol. Microbiol. |
| 6899     | <i>B. abortus</i> 2308               | -                                   | <i>B. abortus</i> $\Delta$ <i>bab1_1070</i> . Strain deleted for <i>wrpA</i> .                       | This study.                                   |
| 7248     | <i>B. abortus</i> 2308               | -                                   | <i>B. abortus</i> $\Delta$ <i>bab1_1070</i> complemented with <i>bab1_1070</i> .                     | This study.                                   |

**Table S3:** Data collection and refinement statistics.

|                                    | <b>WrbA (PDB ID: 5F51)</b>                                        | <b>WrbA + FMN (PDB ID: 5F4B)</b>                                  |
|------------------------------------|-------------------------------------------------------------------|-------------------------------------------------------------------|
| <b>Wavelength (Å)</b>              | 12.66 keV (0.979 Å)                                               | 12.66 keV (0.979 Å)                                               |
| <b>Resolution range (Å)</b>        | 44.32 - 2.53                                                      | 44.7 - 2.49                                                       |
| <b>Space group</b>                 | P 4 <sub>2</sub> 22                                               | P 4 <sub>3</sub> 2 <sub>1</sub> 2                                 |
| <b>Unit cell</b>                   | a= 61.28 b= 61.28 c= 128.34<br>( $\alpha=\beta=\gamma=90^\circ$ ) | a= 63.58 b= 63.58 c= 188.53<br>( $\alpha=\beta=\gamma=90^\circ$ ) |
| <b># molecules in ASU</b>          | 1                                                                 | 2                                                                 |
| <b>Total reflections</b>           | 110348                                                            | 25226                                                             |
| <b>Unique reflections</b>          | 8691                                                              | 13940                                                             |
| <b>Multiplicity</b>                | 12.7                                                              | 1.8                                                               |
| <b>Completeness (%)</b>            | 99.7                                                              | 98.5                                                              |
| <b>Mean I/sigma(I)</b>             | 23.5                                                              | 11.1                                                              |
| <b>R-merge</b>                     | 0.063                                                             | 0.122                                                             |
| <b>Reflections used for R-free</b> | 412                                                               | 758                                                               |
| <b>R-work</b>                      | 0.239                                                             | 0.230                                                             |
| <b>R-free</b>                      | 0.268                                                             | 0.269                                                             |
| <b>RMS(bonds)</b>                  | 0.003                                                             | 0.003                                                             |
| <b>RMS(angles)</b>                 | 0.71                                                              | 0.62                                                              |
| <b>Ramachandran favored (%)</b>    | 94.34                                                             | 98.78                                                             |
| <b>Ramachandran allowed (%)</b>    | 1.89                                                              | 1.22                                                              |
| <b>Ramachandran outliers (%)</b>   | 3.77                                                              | 0                                                                 |

**Table S4:** Biolog conditions with a *B. abortus*  $\Delta rpoE1$  growth defect. Conditions include those outside the 99% confidence interval presented in Figure 2, and 10 additional conditions (\*) identified in which the rate of growth was significantly slower at earlier culture time points, but which showed no significant Abs 630 nm difference at 72 hours (i.e. compounds outside the 99% interval in Figure 2). A *wrpA* null strain did not exhibit a growth defect in any of these conditions.

| Condition | Plate | Well | Compound                                     |
|-----------|-------|------|----------------------------------------------|
| 6         | 1     | A6   | D-Galactose                                  |
| 8         | 1     | A8   | L-Proline                                    |
| 33        | 1     | C9   | $\alpha$ -D-Glucose                          |
| 63        | 1     | F3   | *m-Inositol                                  |
| 170       | 2     | G2   | L-Alaninamide                                |
| 176       | 2     | G8   | Hydroxy-L-Proline                            |
| 248       | 3     | E8   | D-Glucosamine                                |
| 697       | 8     | C1   | *Lys-Gly                                     |
| 828       | 9     | E12  | 7% Urea                                      |
| 835       | 9     | F7   | 7% Sodium Lactate                            |
| 836       | 9     | F8   | 8% Sodium Lactate                            |
| 837       | 9     | F9   | 9% Sodium Lactate                            |
| 838       | 9     | F10  | 10% Sodium Lactate                           |
| 839       | 9     | F11  | 11% Sodium Lactate                           |
| 840       | 9     | F12  | 12% Sodium Lactate                           |
| 859       | 9     | H7   | 10mM Sodium Nitrite                          |
| 860       | 9     | H8   | *20mM Sodium Nitrite                         |
| 976       | 11    | B4   | Amoxicillin                                  |
| 1151      | 12    | H11  | Dodecyltrimethyl ammonium bromide            |
| 1224      | 13    | F12  | Thallium (I) acetate                         |
| 1260      | 14    | A12  | Sanguinarine chloride                        |
| 1308      | 14    | E12  | Sodium metaborate                            |
| 1330      | 14    | G10  | *Sodium Nitrite Conc. 2                      |
| 1332      | 14    | G12  | Sodium Nitrite Conc. 4                       |
| 1380      | 15    | C12  | *1,10-Phenanthroline Monohydrate             |
| 1387      | 15    | D7   | *Domiphen bromide                            |
| 1392      | 15    | D12  | *Nordihydroguaiaretic acid                   |
| 1425      | 15    | G9   | Menadione, sodium bisulfite                  |
| 1451      | 16    | A11  | *5-Chloro-7-iodo-8-hydroxy-quinoline Conc. 3 |
| 1452      | 16    | A12  | *5-Chloro-7-iodo-8-hydroxy-quinoline Conc. 4 |
| 1467      | 16    | C3   | Dichlofluanid                                |
| 1478      | 16    | D2   | Chlorodinitrobenzene                         |
| 1548      | 17    | A12  | Thiosalicylate                               |
| 1551      | 17    | B3   | *Salicylate, sodium                          |
| 1678      | 18    | D10  | Lidocaine                                    |
| 1722      | 18    | H6   | 2- Phenylphenol                              |
| 1827      | 20    | A3   | Amitriptyline                                |
| 1845      | 20    | B9   | **Tetrazolium violet                         |
| 1908      | 20    | G12  | 8-Hydroxyquinoline                           |

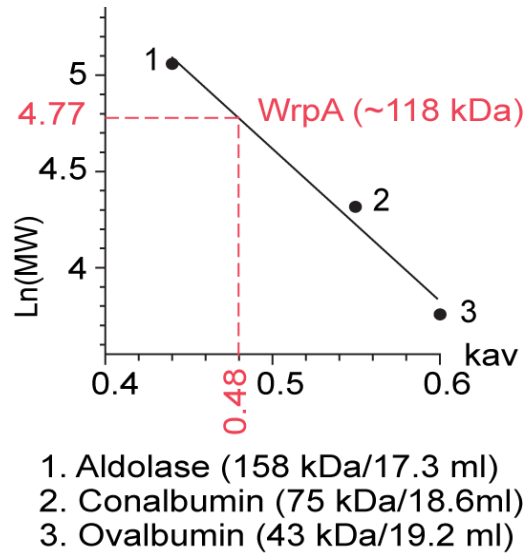

**Figure S1:** Relative elution volumes of protein standards as a function of the natural log of protein molecular weights. Blue dextran [2,000 kDa; void, ~11.9 ml], aldolase [158 kDa; elution, ~17.2 ml], conalbumin [75 kDa; elution, ~18.7 ml], and ovalbumin [43 kDa; elution, ~19.1 ml]) on a Superdex 200 10/300 GL column. Relative elution volume of *B. abortus* WrpA is reported on the graph.

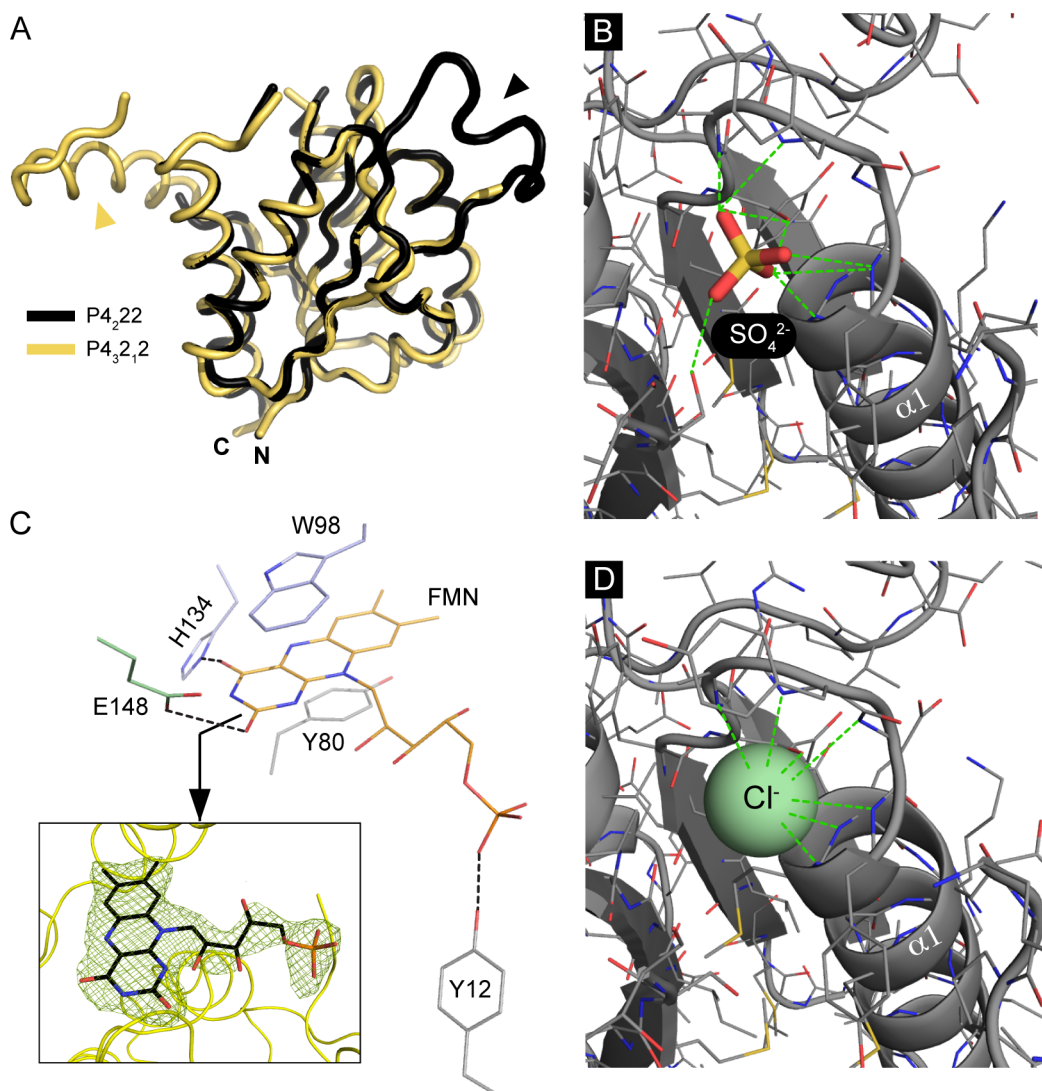

**Figure S2:** A) Structural alignment of WrpA monomers from the two crystal forms of *B. abortus* WrpA. P<sub>4</sub><sub>3</sub><sub>2</sub><sub>1</sub><sub>2</sub> structure is in yellow, with  $\alpha$ -helix  $\alpha'$  (Y144-G157) highlighted with a yellow triangle; P<sub>4</sub><sub>2</sub><sub>2</sub><sub>2</sub> structure is in black with disordered loop L41-I54 highlighted with a black triangle (RMSD of alpha carbons=0.35). B) Interaction map (dotted green line) of the sulfate ion (yellow/red sticks) in WrpA P<sub>4</sub><sub>2</sub><sub>2</sub><sub>2</sub> FMN-binding site. C) Cofactor-protein interactions of FMN (yellow/orange lines) with WrpA in the P<sub>4</sub><sub>3</sub><sub>2</sub><sub>1</sub><sub>2</sub> crystal form. Residues of monomer 1 (Y12, Y80) are in grey; monomer 2 residues that interact with the same FMN cofactor are in violet (W98, H134), and residue E148 from the third monomer is in green. A simulated annealing composite omit map (contoured at 1 $\sigma$ ) of the FMN is inset. D) Zoom view of the chloride ion (green sphere) interaction site in the P<sub>4</sub><sub>3</sub><sub>2</sub><sub>1</sub><sub>2</sub> WrpA crystal structure.

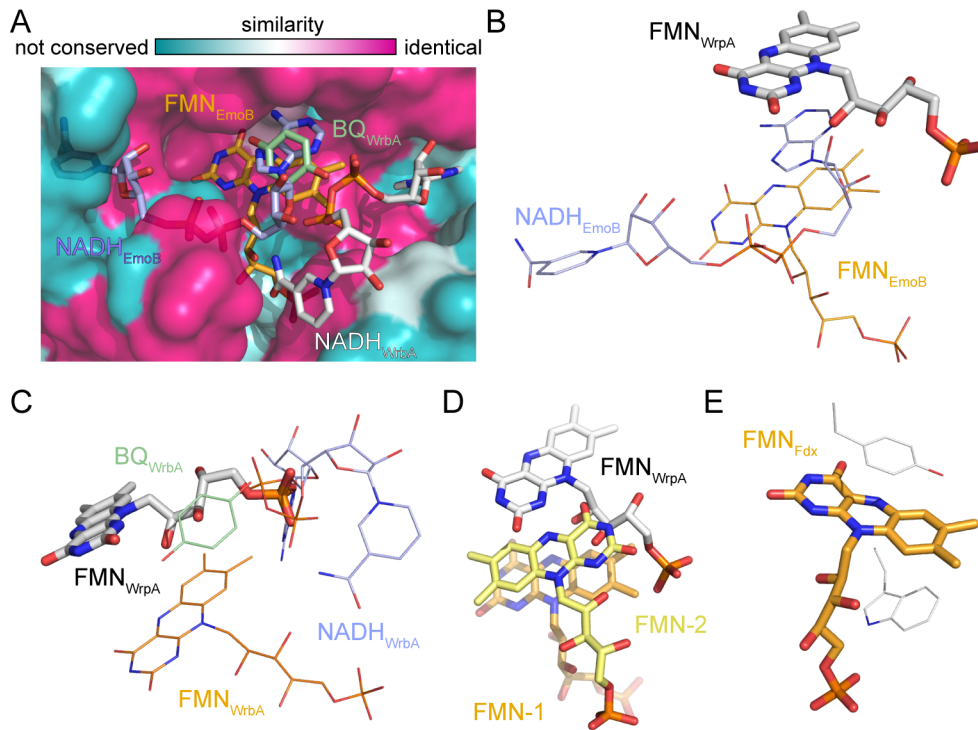

**Figure S3:** A) WrpA cavity modeled with FMN (orange) and NADH (blue) from the EmoB structure (PDB ID: 4LTN) (77) and NADH (white) and benzoquinone (BQ, green) from *E. coli* WrbA structures (PDB ID: 3B6J and 3B6K) (33) showing that the WrpA cavity can accommodate all these molecules. Conservation of WrpA and WrbA<sub>EC</sub> active sites has also been compared: color scale ranges from identical (magenta) to unconerved (blue). B) Superposition of WrpA and EmoB cavities. WrpA FMN (white) adopts a position incompatible with NADH (blue) binding. However, the position of EmoB FMN (orange) is compatible with the presence of NADH in the cavity. FMN and NADH were modeled from the coordinates of EmoB structure (PDB ID: 4LTN) (77). C) WrpA and WrbA<sub>EC</sub> active site cavities were structurally superimposed. WrpA FMN (white) adopts a position incompatible with NADH (blue) or benzoquinone (BQ, green) binding. However, the position of FMN (orange) in WrbA<sub>EC</sub> structure is compatible with NADH or benzoquinone binding. FMN, NADH and benzoquinone were modeled from WrbA<sub>EC</sub> PDB structures 3B6J, 3B6K and 3B6M (33). D) Comparison of EmoB FMN positions (FMN-1 and FMN-2, orange and yellow) to WrpA FMN (white) position. E) Classic interaction pattern of FMN with flavodoxin proteins. As we observed in FMN soaked crystals of *B. abortus* WrpA, the FMN (orange) cofactor is stacked between the side chains (white) of a tryptophan residue and a tyrosine residue (see PDB 1FLV of *Anabaena* 7120 (92)).
